# Supplementary material
Source: MDPI journal article supplement (https://www.mdpi.com/1999-4907/9/1/11)
Supplement: s1 [file s1]

# Supplementary: Fungal Community and Ligninolytic Enzyme Activities in *Quercus deserticola* Trel. Litter from Forest Fragments with Increasing Levels of Disturbance

Jesús A. Rosales-Castillo <sup>1,2</sup>, Ken Oyama <sup>1</sup>, Ma. Soledad Vázquez-Garcidueñas <sup>3</sup>, Rafael Aguilar-Romero <sup>1</sup>, Felipe García-Oliva <sup>4</sup> and Gerardo Vázquez-Marrufo <sup>2,\*</sup>

**Table S1.** Vegetation found in the study plots used as indicator of conservation or disturbance.

| Study Site                                                  | Vegetation Characteristics                                                                                                                                |
|-------------------------------------------------------------|-----------------------------------------------------------------------------------------------------------------------------------------------------------|
| <b>Well preserved</b>                                       |                                                                                                                                                           |
| <i>Bursera</i> sp. <sup>a</sup>                             | The genus <i>Bursera</i> only successfully establish in mature forest and not on disturbed sites.                                                         |
| <i>Fraxinus uhdei</i> (Wenz.) Lingelsh <sup>a</sup>         | Usually located in moist microhabitats such as gullies and ravines, in association with mixed forest; being located in damp oak woods with fertile soils. |
| <i>Laelia speciosa</i> (HBK) Schltr. <sup>a</sup>           | Recorded in primary vegetation of oak forest.                                                                                                             |
| <i>Tillandsia</i> sp. <sup>a</sup>                          | Another vegetation found at the site.                                                                                                                     |
| Lichens <sup>a</sup>                                        |                                                                                                                                                           |
| <b>Moderately disturbed</b>                                 |                                                                                                                                                           |
| <i>Bursera</i> sp. <sup>a</sup>                             | The species the genus <i>Bursera</i> successfully established only in mature forest and not on disturbed sites.                                           |
| <i>Eysenhardtia polystachya</i> (Ortega) Sarg. <sup>b</sup> | It is a species of wide distribution that is located in disturbed sites.                                                                                  |
| <i>Ipomoea murucoides</i> Roem. & Schult <sup>b</sup>       | Registered in primary and secondary vegetation in forests of oak and tropical deciduous forest.                                                           |
| <i>Croton</i> sp. <sup>b</sup>                              | Thickets form in secondary oak forests by species of the genera <i>Croton</i> , <i>Baccharis</i> and <i>Crataegus</i> .                                   |
| <i>Loeselia mexicana</i> (Lam.) Brand. <sup>b</sup>         | Inhabits open areas of oak forest and in abandoned fields.                                                                                                |
| <i>Laelia speciosa</i> <sup>a</sup>                         | Registered in primary vegetation of oak forest.                                                                                                           |
| <b>Heavily disturbed</b>                                    |                                                                                                                                                           |
| <i>Eysenhardtia polystachia</i> <sup>b</sup>                | It is a species of wide distribution that is located in disturbed sites.                                                                                  |
| <i>Croton</i> sp. <sup>b</sup>                              | In secondary oak forests, thickets can be formed by species of the genera <i>Croton</i> , <i>Baccharis</i> and <i>Crataegus</i> .                         |
| <i>Loeselia mexicana</i> <sup>b</sup>                       | Inhabits open areas of oak forest and in abandoned fields.                                                                                                |
| <i>Baccharis conferta</i> HBK <sup>b</sup>                  | Common on the borders of clear and disturbed forests.                                                                                                     |

<sup>a</sup> Vegetation considered indicative of conservation. <sup>b</sup> Vegetation considered indicative of disturbance. Table made with information from references [1–5].

## References

1. Cornejo-Tenorio, G.; Sánchez-García E.; Flores-Tolentino, M.; Santana-Michel F.; Ibarra-Manríquez, G. Flora y vegetación del cerro El Águila, Michoacán, México. *Bot. Sci.* **2013**, *91*, 155–180.
2. Guizar, E.; Sánchez, A. *Guía para el Reconocimiento de los Principales Árboles del Alto Balsas*, 1st ed.; Universidad Autónoma de Chapingo: Texcoco, México, 1991; p. 207.
3. De Rzedowski, G.C.; Rzedowski, J. *Flora Fanerogámica del Valle de México*, 2nd ed.; Instituto de Ecología, A.C. y Comisión Nacional para el Conocimiento y Uso de la Biodiversidad: Michoacán, Mexico, 2005; pp. 1406.
4. Rzedowski, J. *Vegetación de México*, 1st ed.; Comisión Nacional para el Conocimiento y Uso de la Biodiversidad: Mexico City, México, 2006; p. 416.
5. Paz, H.; Pineda-García F.; Pinzón-Pérez, L. Root depth morphology in response to soil drought: comparing ecological groups along the secondary succession in a tropical dry forest. *Oecologia* **2015**, *179*, 551–561, doi:10.1007/s00442-015-3359-6.
